# Supplementary material for: The Influence of Reduced Graphene Oxide on the Texture and Chemistry of N,S-Doped Porous Carbon. Implications for Electrocatalytic and Energy Storage Applications
Source: MDPI journal article supplement (doi:10.3390/nano13162364), 2023-08-18
Supplement: s1 [file s1]

## **SUPPLEMENTARY MATERIAL**

### **INFLUENCE OF REDUCED GRAPHENE OXIDE ON THE TEXTURE AND CHEMISTRY OF N, S-DOPED POROUS CARBON. IMPLICATIONS FOR ELECTROCATALYTIC AND ENERGY STORAGE APPLICATIONS**

Samantha K. Samaniego Andrade<sup>1</sup>, Shiva Shankar Lakshmi <sup>2</sup>, István Bakos<sup>2</sup>, Szilvia Klébert<sup>2</sup>, Robert Kun<sup>2,3</sup>, Miklós Mohai<sup>2</sup>, Balázs Nagy<sup>4</sup>, Krisztina László<sup>1\*</sup>

<sup>1</sup> Department of Physical Chemistry and Materials Science, Faculty of Chemical Technology and Biotechnology, Budapest University of Technology and Economics, 1521 Budapest, Hungary

<sup>2</sup> Institute of Materials and Environmental Chemistry, Research Centre for Natural Sciences, Magyar tudósok körútja 2., Budapest, H-1117, Hungary

<sup>3</sup> Department of Chemical and Environmental Process Engineering, Faculty of Chemical Technology and Biotechnology, Budapest University of Technology and Economics, 1521 Budapest, Hungary

<sup>4</sup> H-ion Research, Development and Innovation Ltd., 1121 Budapest Konkoly-Thege út 29-33

\*Corresponding author: [laszlo.krisztina@vbk.bme.hu](mailto:laszlo.krisztina@vbk.bme.hu)

## FIGURES

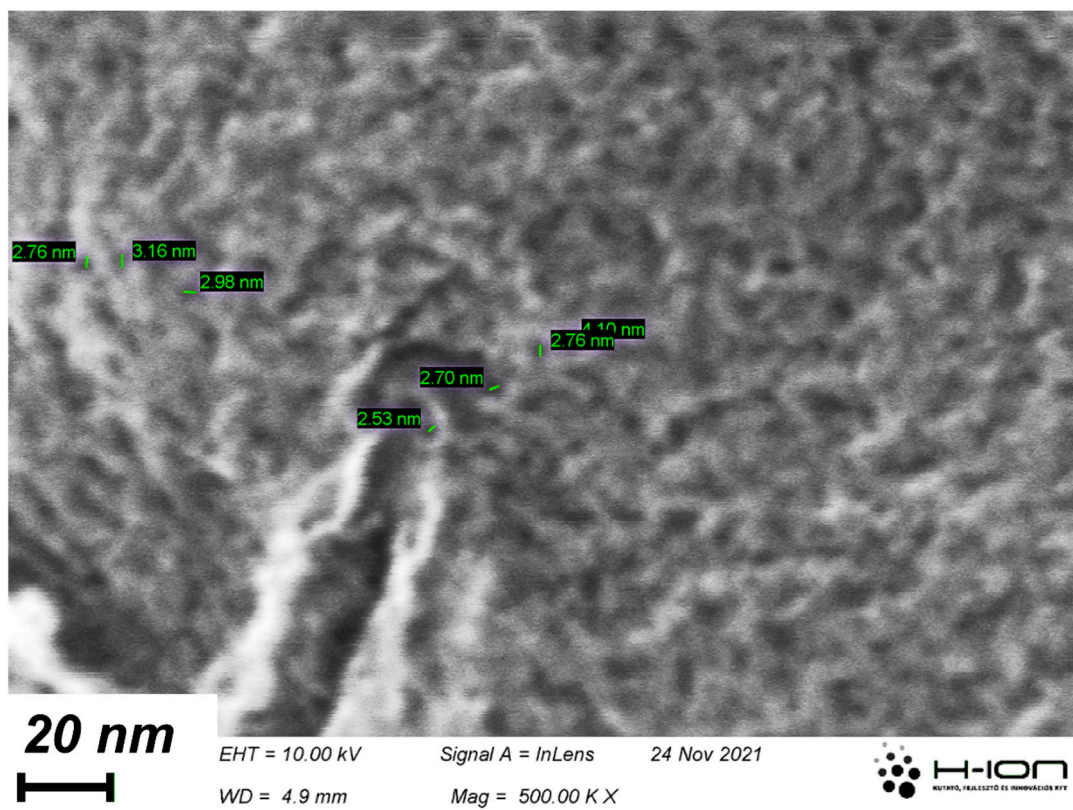

**Figure S1** SEM image of the CA matrix showing nanopores of width 2–3 nm

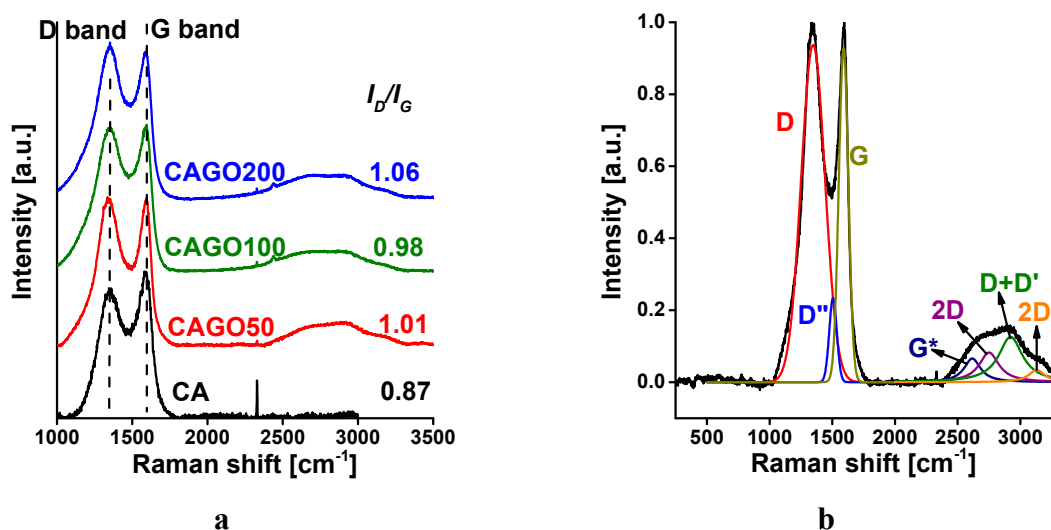

**Figure S2** Raman spectra of the annealed carbon samples (a); deconvoluted Raman spectrum of CAGO50 (b). The peaks in the first order region are assigned as G: graphitic band, related to the vibrations of the sp<sup>2</sup> building blocks; D: defect band, related to the structural disorder; D': disordered graphitic lattices; D'': amorphous carbon [89, 90, 91], and in the second order region as 2D: structural order; G\*, D+D', and 2D' [92]. See also Tables S1-S2.

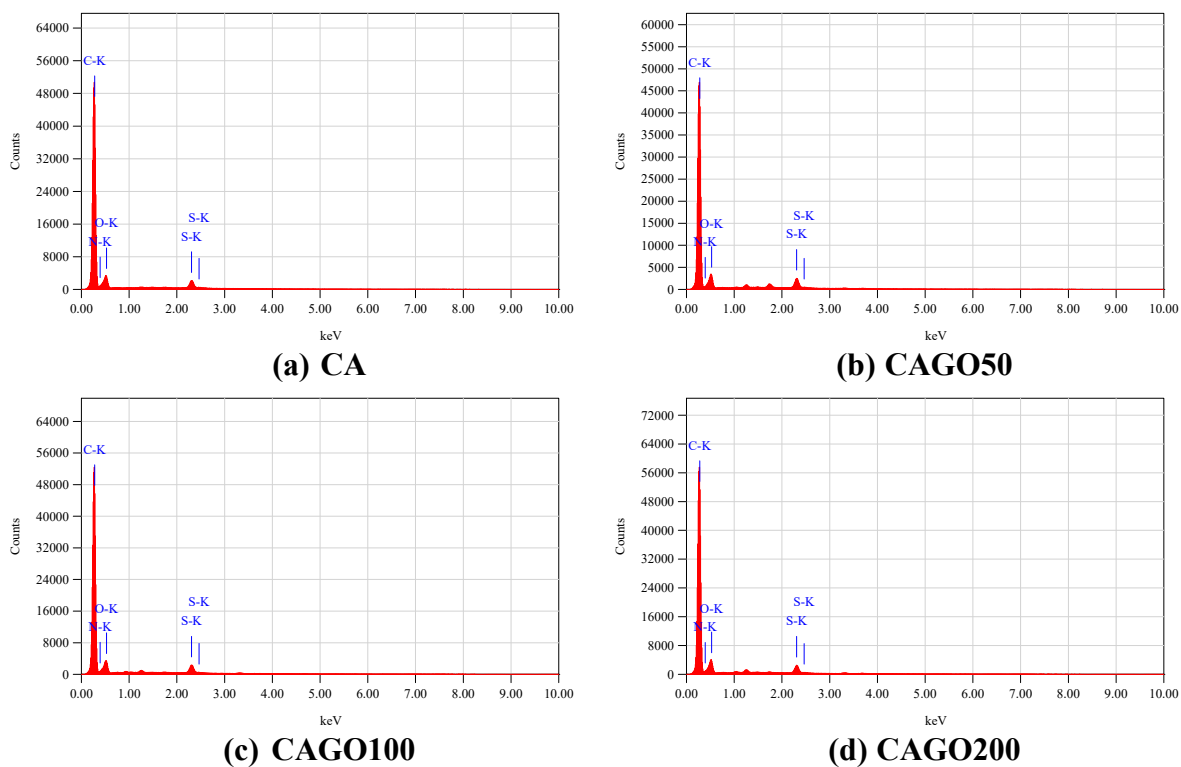

**Figure S3** SEM/EDS spectra of the samples (at magnification x100)

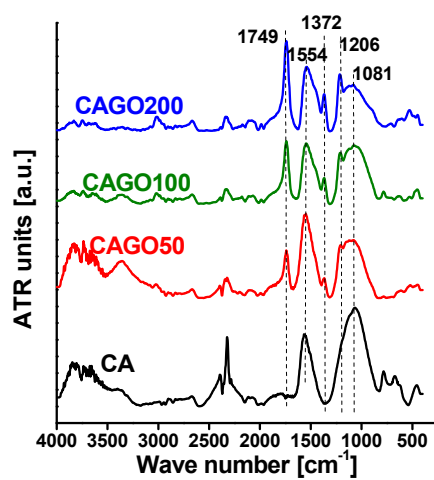

**Figure S4** FTIR spectra of the carbon samples. See also Table S4

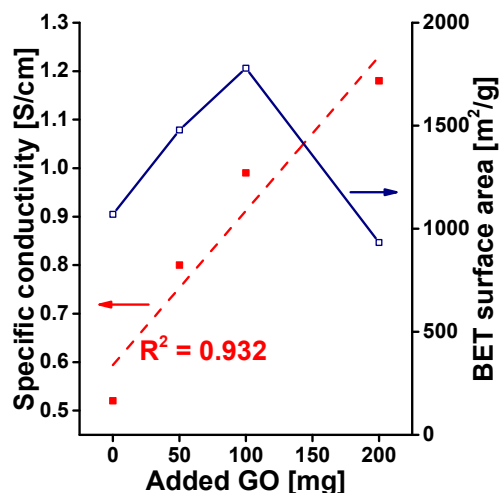

**Figure S5** Influence of added GO on the specific conductivity and apparent surface area

The **effect of the electrode loading** was studied with the sample CAGO50 (**Figure S6**). The mass specific CV signals (**Figure S6b**) almost coincide, i.e., the active surface area increases proportionally with increasing coverage of the glassy carbon surface only up to 100  $\mu\text{g}/\text{cm}^2$  loading. At 400  $\mu\text{g}/\text{cm}^2$  the deformed shape of the mass specific current density curve implies that the deep carbon layer influences the transfer mechanism. The excessive amount of carbon covering the GC surface turns into a 3D coating and obstructs the electron diffusion, as corroborated by **Figure S6c**: reducing the polarization speed from 50 mV/s to 10 mV/s leads to a more ideal CV curve even for this high loading, as this allows more time for the electrolyte to reach the equilibrium state.

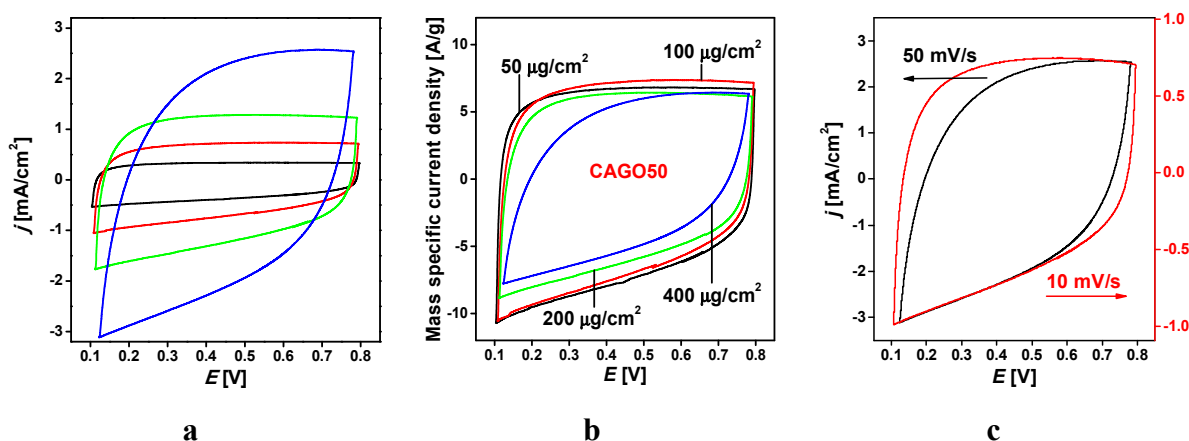

**Figure S6** Effect of loading on the electrode (a) Cyclic voltammogram of CAGO50 covered GC electrode in 0.1 M KOH at various loadings: 50 (black), 100 (red), 200 (green), 400 (blue)  $\mu\text{g}/\text{cm}^2$ . Sweep rate: 50 mV/s. (b) Mass specific cyclic voltammogram of CAGO50 covered electrode in 0.1 M KOH; (c) Loading: 400  $\mu\text{g}/\text{cm}^2$ , sweep rate 50 mV/s (black) and 10 mV/s (red).

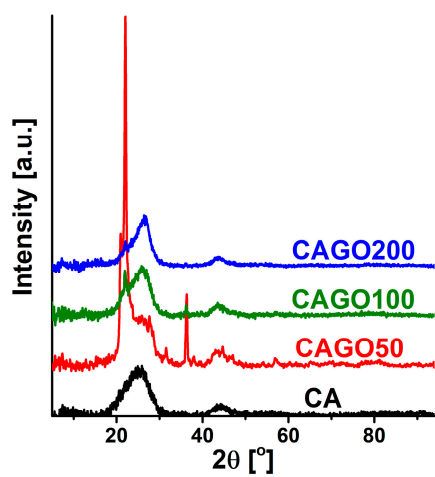

**Figure S7** XRD diffractograms of CA and rGO doped carbon samples. Normalized to peak at  $2\theta \approx 25-26$  position

## TABLES

**Table S1** Yield of the synthesis steps (%)

| Sample  | Carbonization | Acid washing | Annealing |
|---------|---------------|--------------|-----------|
| CA      | 10            | 53           | 67        |
| CAGO50  | 9             | 63           | 35        |
| CAGO100 | 12            | 66           | 37        |
| CAGO200 | 15            | 68           | 45        |

**Table S2** Raman shifts from the deconvoluted spectra (Figure S2b) [ $\text{cm}^{-1}$ ]\*

|         | 1 <sup>st</sup> order region |      |      |      |           | 2 <sup>nd</sup> order region |      |      |      |
|---------|------------------------------|------|------|------|-----------|------------------------------|------|------|------|
|         | D                            | D''  | G    | D'   | $I_D/I_G$ | G*                           | 2D   | D+D' | 2D'  |
| [128]   | 1350                         | 1506 | 1580 | 1600 |           | 2450                         | 2700 | 2900 | 3100 |
| CA      | 1353                         | 1527 | 1597 | 1619 | 1.39      |                              |      |      |      |
| CAGO50  | 1347                         | 1506 | 1590 |      | 1.01      | 2617                         | 2750 | 2922 | 3131 |
| CAGO100 | 1358                         | 1516 | 1593 |      | 1.11      | 2498                         | 2699 | 2917 | 3088 |
| CAGO200 | 1355                         | 1514 | 1590 |      | 1.12      | 2495                         | 2689 | 2920 | 3131 |

\* Raman spectra were deconvoluted into Gaussian peaks using the peak analyzer function in Origin software. G: graphitic band, related to the vibrations of the  $\text{sp}^2$  building blocks; D: defect band, related to the structural disorder; D': disordered graphitic lattices; D'': amorphous carbon [80, 81, 82], 2D: structural order; G\*, D+D', and 2D' [92].

**Table S3** Selected data deduced from the deconvoluted Raman spectra (Figure S2b)

| Sample  | $\Delta^*$<br>[ $\text{cm}^{-1}$ ] | $I_G$<br>[a.u.] | $\Delta/I_G$ | $I_{D''}$<br>[a.u.] |
|---------|------------------------------------|-----------------|--------------|---------------------|
| CA      | 78                                 | 0.61            | 127          | 0.43                |
| CAGO50  | 89                                 | 0.93            | 96           | 0.23                |
| CAGO100 | 90                                 | 0.82            | 110          | 0.18                |
| CAGO200 | 92                                 | 0.84            | 109          | 0.16                |

\*  $\Delta$  is the full width of the deconvoluted G band at half maximum (FWHM)

**Table S4** Ratio of the various carbon species based on FTIR spectra (Figure S4)

| Sample  | C=O/C=C | OH/C=C |
|---------|---------|--------|
| CA      | 0.16    | 0.05   |
| CAGO50  | 0.57    | 0.25   |
| CAGO100 | 1.03    | 0.41   |
| CAGO200 | 1.38    | 0.58   |
